# Supplementary material
Source: MDPI journal article supplement (https://www.mdpi.com/2073-4344/11/9/1021)
Supplement: s1 [file s1]

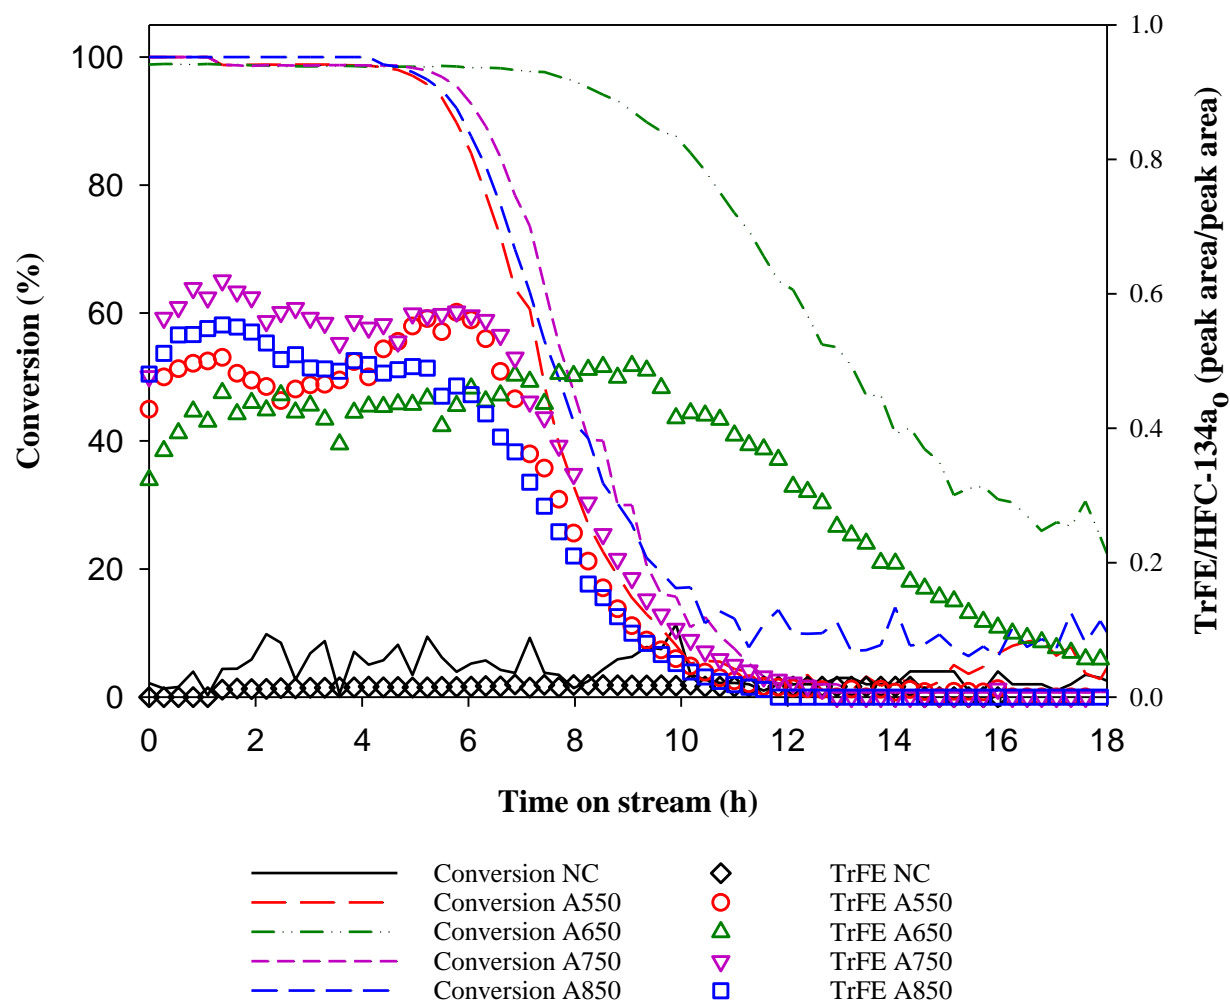

**Figure S1:** HFC-134a conversion rate and TrFE formation rate.

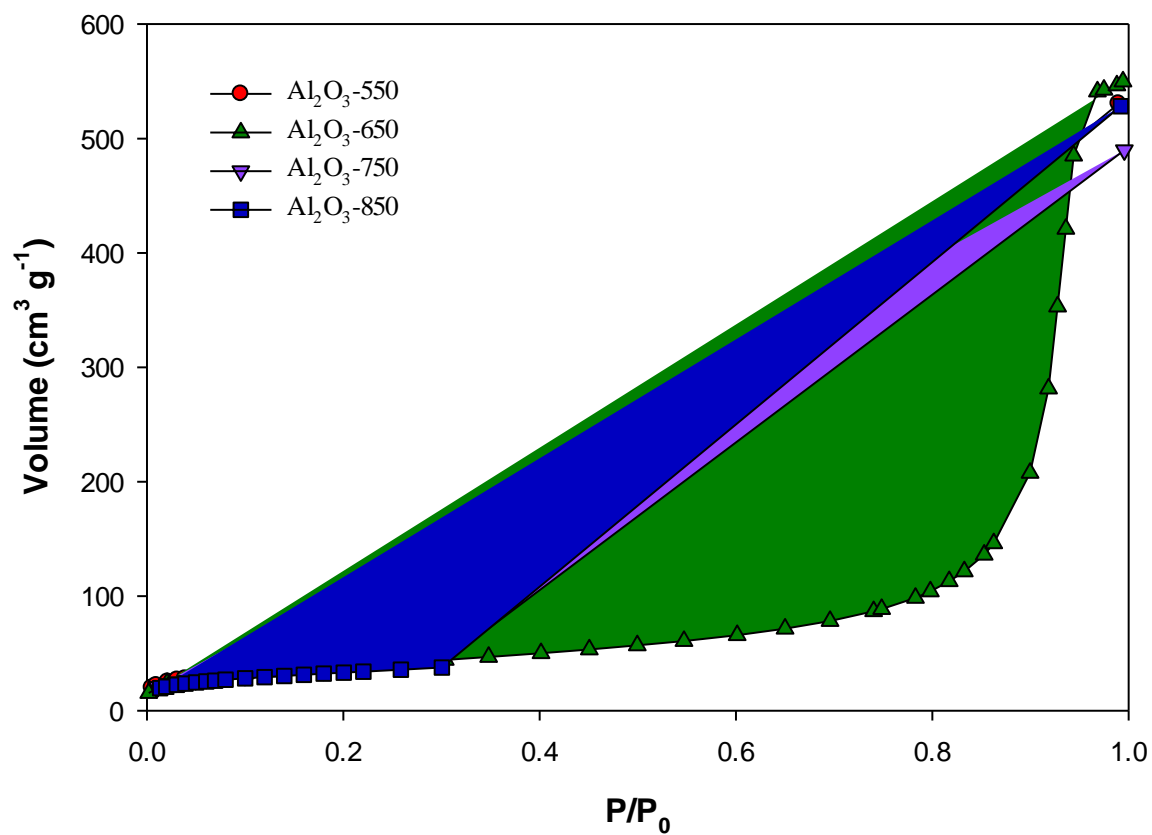

**Figure S2:** The N<sub>2</sub> adsorption isotherm of A650.
